# Supplementary material
Source: Springer Nature journal article supplement (https://www.springermedizin.de/resource/supplementary/12879_2011_1699_MOESM14_ESM.pdf/9443266)

Number of times entered

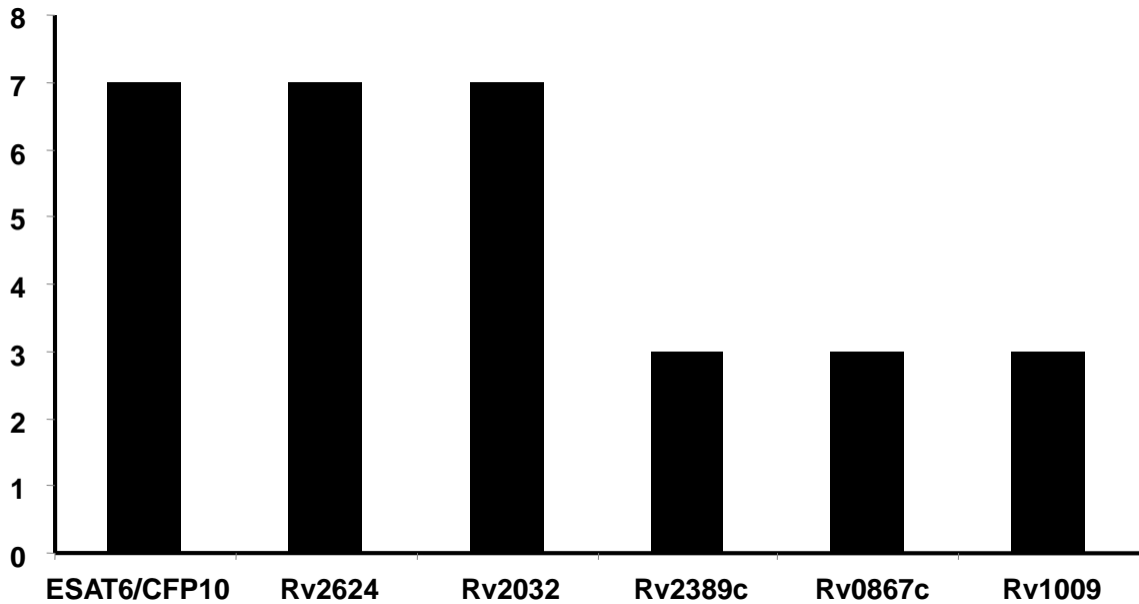

Supplement: MOESM14 [file 9443266]
